# Supplementary material
Source: HighWire-hosted journal article supplement (https://spcare.bmj.com/content/14/e1/e89)
Supplement: inline-supplementary-material-1 [file inline-supplementary-material-1.pdf]

**Supplementary Table 1 Studies that compared the characteristics of patients who received palliative radiotherapy vs those that did not**

| Author<br>Country<br>Healthcare System<br>Date                                   | Data source<br>Study design<br>Study duration<br>Sample size                                                                           | Description of cancer                    | Description of Palliative Radiotherapy                                                                                                                                | Distance/ travel time measure                                                                                                                                            | Characteristics controlled for                                                                                                                                                      | Summary of key results                                                                                                                                                                                                                                                                                                                                                                                                                                                                                       |
|----------------------------------------------------------------------------------|----------------------------------------------------------------------------------------------------------------------------------------|------------------------------------------|-----------------------------------------------------------------------------------------------------------------------------------------------------------------------|--------------------------------------------------------------------------------------------------------------------------------------------------------------------------|-------------------------------------------------------------------------------------------------------------------------------------------------------------------------------------|--------------------------------------------------------------------------------------------------------------------------------------------------------------------------------------------------------------------------------------------------------------------------------------------------------------------------------------------------------------------------------------------------------------------------------------------------------------------------------------------------------------|
| Asli et al. <sup>36</sup><br><br>Norway<br>Publicly Funded<br>2018               | Cancer Registry of Norway<br>Retrospective cohort<br>1 <sup>st</sup> July 2009 – 31 <sup>st</sup> Dec 2011<br><br>n = 25,287           | All primary sites (included all cancers) | PRT dose ≤ 39.5Gy during the last two years of life.                                                                                                                  | Shortest road travel distance to the radiotherapy centre the majority of patients in that municipality are treated in. Distance was split into nine distance categories. | Age, Sex, Cancer site, Survival time , Receipt of previous curative radiotherapy , Education, Household income, RT facility at diagnosing hospital                                  | Patients living between 100km and 500km away had lower odds of receiving PRT in the last two years of life.<br>0 – 9.9km [REF]<br>10 – 49.9 [OR 0.93 95%CI 0.81–1.06],<br>50.0–99.9 [OR 0.98 95%CI 0.85–1.11]<br>100.0–199.9 [OR 0.83 95%CI 0.73–0.95],<br>200.0–299.9 [OR 0.75 95% CI 0.60–0.93],<br>300.0–399.9 [OR 0.71 95%CI 0.54–0.93]<br>400.0–499.9 [OR 0.61 95%CI 0.38–1.00]<br>500.0–799.9 [OR 0.72 95% CI 0.38–1.34],<br>>800.0 [OR 0.81 95%CI 0.41–1.61]<br><b>Included in the Meta-Analysis.</b> |
| Danielson et al. <sup>18</sup><br><br>Canada<br>Publicly Funded<br>2008          | Alberta Cancer Registry<br>Retrospective cohort<br>2000 – 2004<br><br>n = 1,906                                                        | Breast Cancer                            | Radiotherapy given with palliative intent.<br><br>Sites of PRT: Bone, Brain, Locoregional and Eye.                                                                    | Driving distance to the nearest cancer centre. . Categories (≤ 50 km & > 50km)                                                                                           | Distance was not included as a variable in the multivariate model.                                                                                                                  | Women living ≤ 50km from the nearest radiotherapy centre were more likely to receive PRT.<br>≤50 km 56.1% of patients received PRT,<br>>50km 41.3% of patients received PRT (p<0.001)<br><b>Included in the Meta-Analysis</b>                                                                                                                                                                                                                                                                                |
| Hayman et al. <sup>34</sup><br><br>USA<br>Mixed private & public funding<br>2007 | Surveillance Epidemiology and End Results (SEER)<br>Retrospective cohort<br>2010 – 2011 (year of diagnosis 1991-1996)<br><br>n = 2,007 | Metastatic non-small cell lung cancer    | Defined as palliative radiotherapy if received radiotherapy within four months of diagnosis or claim within two years of diagnosis containing any code indicating RT. | Travel distance to the nearest radiotherapy center.                                                                                                                      | Age at diagnosis, Sex, Race, Median household income, Year of diagnosis, SEER registry, Comorbidity score, Hospitalized , Admission to a teaching hospital, Receipt of chemotherapy | Living further from the nearest radiotherapy centre was not associated with being less likely to receive PRT.<br>OR> 1 Higher odds of receiving PRT<br><br>0 – 5 miles [REF]<br>6 – 10miles [OR 1.05 95%CI 0.90 ,1.23]<br>11-25 miles [OR 0.93 95%CI 0.79, 1.10]<br>26 –50 miles [OR1.03 95%CI 0.88, 1.22]<br>≥ 51 miles [OR 0.90 95%CI 0.76, 1.06]<br><b>Included in the Meta-Analysis</b>                                                                                                                  |

|                                                                                                           |                                                                                                                                                                            |                                                           |                                                                                                                                                                                                                     |                                                                                                                                                                                               |                                                                                                                                                                                                                            |                                                                                                                                                                                                                                                                                                                                                                                 |
|-----------------------------------------------------------------------------------------------------------|----------------------------------------------------------------------------------------------------------------------------------------------------------------------------|-----------------------------------------------------------|---------------------------------------------------------------------------------------------------------------------------------------------------------------------------------------------------------------------|-----------------------------------------------------------------------------------------------------------------------------------------------------------------------------------------------|----------------------------------------------------------------------------------------------------------------------------------------------------------------------------------------------------------------------------|---------------------------------------------------------------------------------------------------------------------------------------------------------------------------------------------------------------------------------------------------------------------------------------------------------------------------------------------------------------------------------|
| Huang et al. <sup>6</sup><br><br>Canada<br>Publicly funded<br>2014                                        | British Columbia Cancer Registry<br>Retrospective cohort<br>Patients who died<br>between 1 <sup>st</sup> April 2010 –<br>and March 31 <sup>st</sup> 2011<br><br>n = 12,300 | All cancer<br>patients                                    | Defined as palliative RT<br>if a palliative intent<br>code was provided by<br>the treating oncologist<br>or if the dose of<br>treatment was <30Gy.<br>They tested utilization<br>of PRT in the last year<br>of life | Travel time to the<br>closest cancer centre<br>from patients address.<br>The address that they<br>lived at when the last<br>primary cancer was<br>diagnosed (≤ 2 hours<br>vs >2 hours)        | Age, Sex, Primary cancer<br>site, Survival times from<br>diagnosis                                                                                                                                                         | Patients living further from the cancer<br>centre had reduced odds of receiving<br>PRT in their last year of life compared to<br>those living closer.<br>OR > 1 Higher odds of receiving PRT<br><br>>2 hour [REF]<br>≤ 2 hours [OR 1.44 95%CI 1.28 -1.62]                                                                                                                       |
| Johnston et al. <sup>28</sup><br><br>Canada<br>Publicly funded<br>2001                                    | Nova Scotia Cancer<br>Registry<br>Retrospective cohort<br>April 1992 – Dec 1998<br>(Died between 1994-<br>1998)<br><br>n = 9,978                                           | All adults > 20<br>who died of<br>cancer                  | RT considered<br>palliative if there was<br>palliative intent code<br>provided by radiation<br>oncologist of if ≤ 10<br>fractions were<br>administered in the<br>last nine months of<br>life.                       | Distance from the<br>postcode at death to<br>the provincial cancer<br>centre.<br><br>“As the crow flies”<br>distance to the cancer<br>centre. (<25 miles, 25-<br>100, 100-200 &<br>>200miles) | Age at death, Sex,<br>Community median<br>household income<br>(MHI), Year of death,<br>Microscopic<br>confirmation, Cause of<br>death, Time from<br>diagnosis to death,<br>Receipt of RT in year<br>before terminal period | Living closer was associated with higher<br>odds of having a radiotherapy<br>consultation and receiving PRT after<br>having the initial consultation<br>OR> 1 lower likelihood of receiving PRT<br>given already having a RT consultation.<br><br><25km [OR 0.84 95%CI 0.68, 1.04]<br>25 – 100 [OR 0.95 95%CI 0.46, 1.19]<br>100-200 [OR 0.70 95%CI 0.56, 0.88]<br>>200km [REF] |
| Khor et al. <sup>35</sup><br><br>Australia<br>Publicly Funded<br>2013                                     | HOSPRO database<br>People receiving PRT<br>between 1998 – 2010<br><br>n = 48,200                                                                                           | Range of<br>primary cancer<br>types                       | Palliative intent.<br>Retreatment.                                                                                                                                                                                  | Distance from the<br>residential postcode to<br>the treatment centre<br><100km & ≥100km                                                                                                       | Chi-square test was used<br>to evaluate if the<br>retreatment proportion<br>for patients living <100<br>km and > 100 km from<br>the treatment facility<br>was the same                                                     | Patients who travelled > 100km had a<br>lower PRT retreatment rate than those<br>closer.<br>Retreatment rates decrease with<br>increasing distance from treatment<br>centre up to 100 km, beyond this<br>threshold patients can access subsidised<br>travel and accommodation.                                                                                                  |
| Kong et al. <sup>29</sup><br><br>Canada<br>Publicly funded<br>2012<br><br>Linked to:<br>Kong et al (2015) | Ontario Cancer Registry<br>Retrospective cohort<br>1984- 2007<br><br>n =494,709                                                                                            | Brain<br>Metastases with<br>a range of<br>primary cancers | Whole brain<br>radiotherapy in the last<br>two years of life                                                                                                                                                        | Linear travel distance<br>between residence at<br>time of diagnosis and<br>cancer centre (<10km,<br>10-50km and >50km)                                                                        | Sex, Age at death,<br>Socioeconomic status,<br>Primary cancer site,<br>Time between diagnosis<br>and death, Availability of<br>radiotherapy service,<br>Waiting time, Year of<br>death                                     | Patients who lived closer to a<br>radiotherapy centre were more likely to<br>receive whole brain radiation therapy<br>for brain metastases than those living<br>further away.<br><10km [OR 1.06 95%CI 1.02,1.09]<br>10 - 50 [REF]<br>>50 km [OR 0.93 95%CI 0.90, 0.97]                                                                                                          |

|                                                                                 |                                                                                                                   |                                                                     |                                                                                                                                                                                                                                                                              |                                                                                                                            |                                                                                                                                                                                                                 |                                                                                                                                                                                                                                                                                                                                                                                                                                                            |
|---------------------------------------------------------------------------------|-------------------------------------------------------------------------------------------------------------------|---------------------------------------------------------------------|------------------------------------------------------------------------------------------------------------------------------------------------------------------------------------------------------------------------------------------------------------------------------|----------------------------------------------------------------------------------------------------------------------------|-----------------------------------------------------------------------------------------------------------------------------------------------------------------------------------------------------------------|------------------------------------------------------------------------------------------------------------------------------------------------------------------------------------------------------------------------------------------------------------------------------------------------------------------------------------------------------------------------------------------------------------------------------------------------------------|
| <p>Kong et al <sup>30</sup></p> <p>Canada<br/>Publicly funded<br/>2015</p>      | <p>Ontario Cancer Registry<br/>Retrospective cohort<br/>1998 -2007</p> <p>n =231,397</p>                          | <p>Brain<br/>metastases with<br/>a range of<br/>primary cancers</p> | <p>Whole brain radiation<br/>for brain metastases in<br/>the last two years of<br/>life.</p>                                                                                                                                                                                 | <p>Travel distance from<br/>home to the nearest<br/>radiotherapy centre<br/>(&lt;10km, 10-50km and<br/>&gt;50km)</p>       | <p>Sex, Age at death,<br/>Primary site, Time from<br/>diagnosis to death,<br/>Socioeconomic status,<br/>Availability of<br/>radiotherapy at<br/>diagnosing hospital,<br/>Median prevailing<br/>waiting time</p> | <p>Those who lived closer to a radiotherapy<br/>centre had higher odds of receiving<br/>whole brain PRT.<br/>OR&gt; 1 higher odds of receiving PRT</p> <p>&lt;10km [OR 1.06 95%CI 1.01, 1.12]<br/>10 - 50 [REF]<br/>&gt;50 km [OR 0.95 95%CI 0.91, 0.999]<br/><b>Included in the Meta-Analysis</b></p>                                                                                                                                                     |
| <p>Lavergne et al <sup>31</sup></p> <p>Canada<br/>Publicly Funded<br/>2011</p>  | <p>Nova Scotia Cancer<br/>Registry<br/>Retrospective cohort<br/>Died between 2000 –<br/>2005</p> <p>n =13,494</p> | <p>Range of<br/>primary cancers</p>                                 | <p>Palliative consultation<br/>and treatment rates in<br/>the last nine months of<br/>life.</p>                                                                                                                                                                              | <p>Road travel time from<br/>the resident's<br/>postcode at death to<br/>the closest treatment<br/>centre.</p>             | <p>Sex, Age, Cancer Site,<br/>Survival time, Medical<br/>oncology consultation,<br/>Previous radiotherapy,<br/>Place of death, Place of<br/>residence, Deprivation<br/>quintiles, Urban/ rural<br/>location</p> | <p>For every 1 hour from the treatment<br/>centre the odds of receiving PRT in the<br/>last nine months of life declined.<br/>OR&gt; 1 higher odds of receiving PRT</p> <p>Every 1 hour [OR 0.84 95%CI 0.79,0.88]</p>                                                                                                                                                                                                                                      |
| <p>Mackillop et al <sup>32</sup></p> <p>Canada<br/>Publicly Funded<br/>2016</p> | <p>Ontario Cancer Registry<br/>Retrospective Cohort<br/>Died between 2006 –<br/>2010</p> <p>n = 127,547</p>       | <p>PRT for<br/>Metastases<br/>Range of<br/>primary cancers</p>      | <p>Courses of PRT were<br/>identified from the<br/>registry by intent.<br/>Where intent was<br/>missing it was imputed<br/>by fraction size total<br/>dose and total number<br/>of fractions. The rate<br/>of was measured as<br/>PRT in the last two<br/>years of life.</p> | <p>Travel distance from<br/>home to the nearest<br/>radiotherapy centre<br/>(&lt;10km, 10-50km,<br/>&gt;50km)</p>          | <p>Sex, Age at death, Time<br/>from diagnosis to death,<br/>Primary cancer site,<br/>Socioeconomic status,<br/>Availability of<br/>radiotherapy at the<br/>diagnosing hospital</p>                              | <p>Living further from the radiotherapy<br/>centre was associated with reduced<br/>odds of receiving PRT in the last two<br/>years of life.<br/>OR &gt; 1 Higher odds of receiving PRT.</p> <p>&lt; 10km [REF]<br/>10– 50km [OR 0.91 95%CI 0.88, 0.94]<br/>&gt; 50KM [OR 0.82 95%CI 0.79, 0.85]</p> <p>Distance had a stronger effect for those<br/>patients who were diagnosed at a<br/>hospital with no RT.<br/><b>Included in the Meta-Analysis</b></p> |
| <p>Sutton et al. <sup>33</sup></p> <p>Canada<br/>Publicly funded<br/>2010</p>   | <p>Ontario Cancer Registry<br/>Retrospective Cohort<br/>Died between 1984 –<br/>2004</p>                          | <p>Bone Metastasis<br/>[Range of<br/>primary cancers]</p>           | <p>PRT identified by the<br/>intent of treatment<br/>and the body region<br/>irradiated.</p>                                                                                                                                                                                 | <p>Travel distance<br/>between the patient's<br/>residence at the time<br/>of diagnosis and the<br/>cancer centre most</p> | <p>Sex, Age at death,<br/>Median household<br/>income, Primary cancer<br/>site, Time between<br/>diagnosis and death,</p>                                                                                       | <p>Living further from the RT centre was<br/>associated with reduced odds of<br/>receiving PRT in the last two years of<br/>life.<br/>OR&gt; 1 Higher odds of receiving PRT.</p>                                                                                                                                                                                                                                                                           |

|                                                                 |                                                                                                 |                          |                                                                                                                           |                                                                                                        |                                                                                                                                                                                              |                                                                                                                                                                                         |
|-----------------------------------------------------------------|-------------------------------------------------------------------------------------------------|--------------------------|---------------------------------------------------------------------------------------------------------------------------|--------------------------------------------------------------------------------------------------------|----------------------------------------------------------------------------------------------------------------------------------------------------------------------------------------------|-----------------------------------------------------------------------------------------------------------------------------------------------------------------------------------------|
|                                                                 | n = 434,241                                                                                     |                          | The proportion of patients who received at least one course of PRT for bone metastases within the last two years of life. | frequently visited by patients in the same census subdivision. (<10km, 10-50km, >50km)                 | Availability of RT services at the diagnosing hospital, Prevailing waiting time, Year of death                                                                                               | < 10km [REF]<br>10– 50km [OR 0.90 95%CI 0.88, 0.93]<br>>50km [OR 0.81 95%CI 0.80,0.84]<br><b>Included in the Meta-Analysis</b>                                                          |
| Wu et al <sup>27</sup><br><br>Canada<br>Publicly funded<br>2010 | Tom Baker Cancer Centre<br>Retrospective Cohort<br>First course of PRT 2003-2005<br><br>n = 887 | PRT for bones metastases | Study focused on repeated access for PRT provided for bone metastases.                                                    | Travel distance to the cancer centre from patient's last known residential postcode (≤ 50km vs >50 km) | Study analysed repeat PRT visits using a multivariate poisson model<br>Service provider, Age, Primary cancer, Disease free interval, Symptom free interval, Bone complication, Fractionation | Travel distance over 50km was associated with a reduced likelihood of repeat PRT visits compared to those living < 50km away.<br><br>≤50km vs >50 km [Rate Ratio 1.29 95% CI .04, 1.59] |
